# Supplementary material for: Clouds damp the radiative impacts of polar sea ice loss
Source: Copernicus journal article supplement (doi:10.5194/tc-14-2673-2020), 2020-08-21
Supplement: Supplementary file 1 [file tc-14-2673-2020-supplement.pdf]

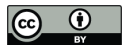

*Supplement of*

## **Clouds damp the radiative impacts of polar sea ice loss**

**Ramdane Alkama et al.**

*Correspondence to:* Ramdane Alkama ([ram.alkama@hotmail.fr](mailto:ram.alkama@hotmail.fr)) and Patrick C. Taylor ([patrick.c.taylor@nasa.gov](mailto:patrick.c.taylor@nasa.gov))

The copyright of individual parts of the supplement might differ from the CC BY 4.0 License.

**Mean net shortwave at the surface SWsfc ( $\text{W/m}^2$ )**

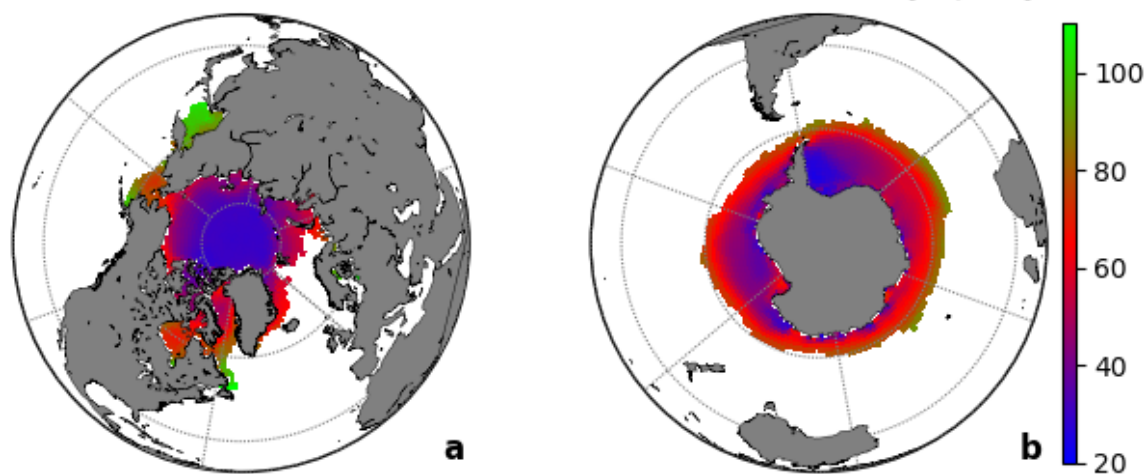

**Figure S1** Mean (over 2001-2016) net radiation at the surface (NETsrf) over polar seas based on CERES data.

**Correlation between SWsfc+LWsfc and SWcre+LWcre**

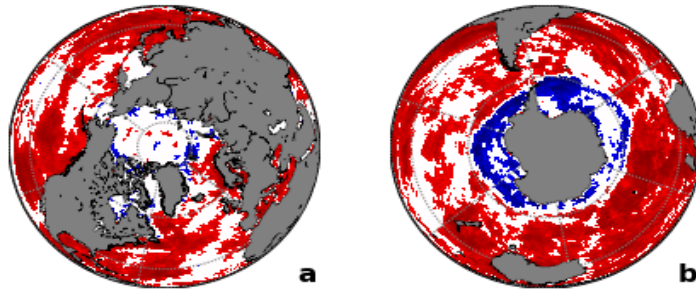

**Correlation between SWsfc+LWsfc and SWcre**

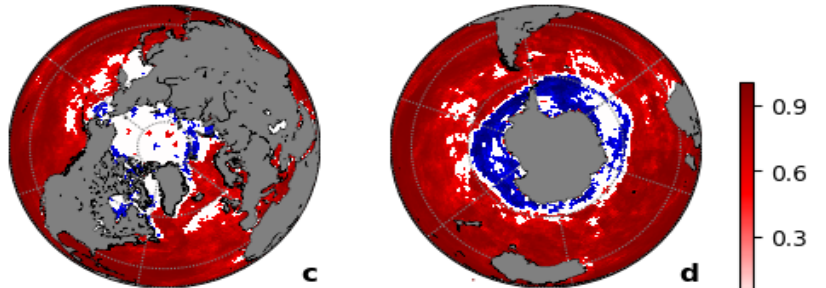

**Correlation between SWsfc and SWcre**

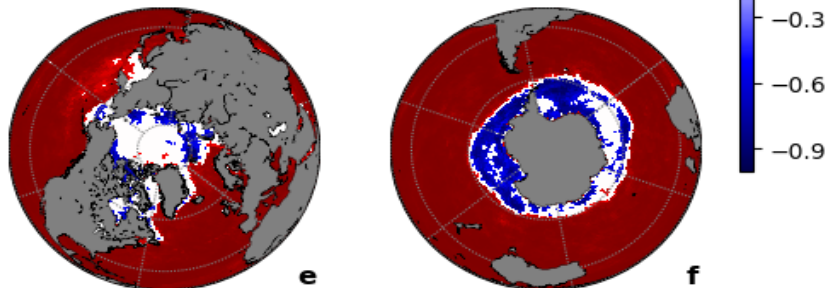

**Correlation between SWsfc+LWsfc and LWcre**

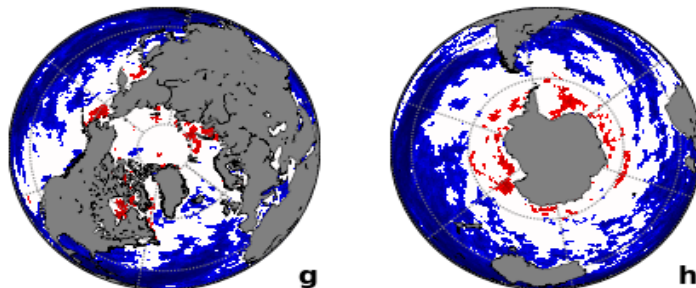

37

38 **Figure S2** Same as figure 1 but only significant correlations are shown by blue and red colors. To  
 39 test the significance of the observed correlations, we used the Pearson's correlation test of  
 40 significance at level  $\alpha = 0.05$  for  $16-2=14$  (16 years) degrees of freedom which correspond to the  
 41 use of the critical values for Pearson  $r_0=0.497$ . This means that all correlation between  $-0.497$  and  
 42  $0.497$  are not significant and set to white color.

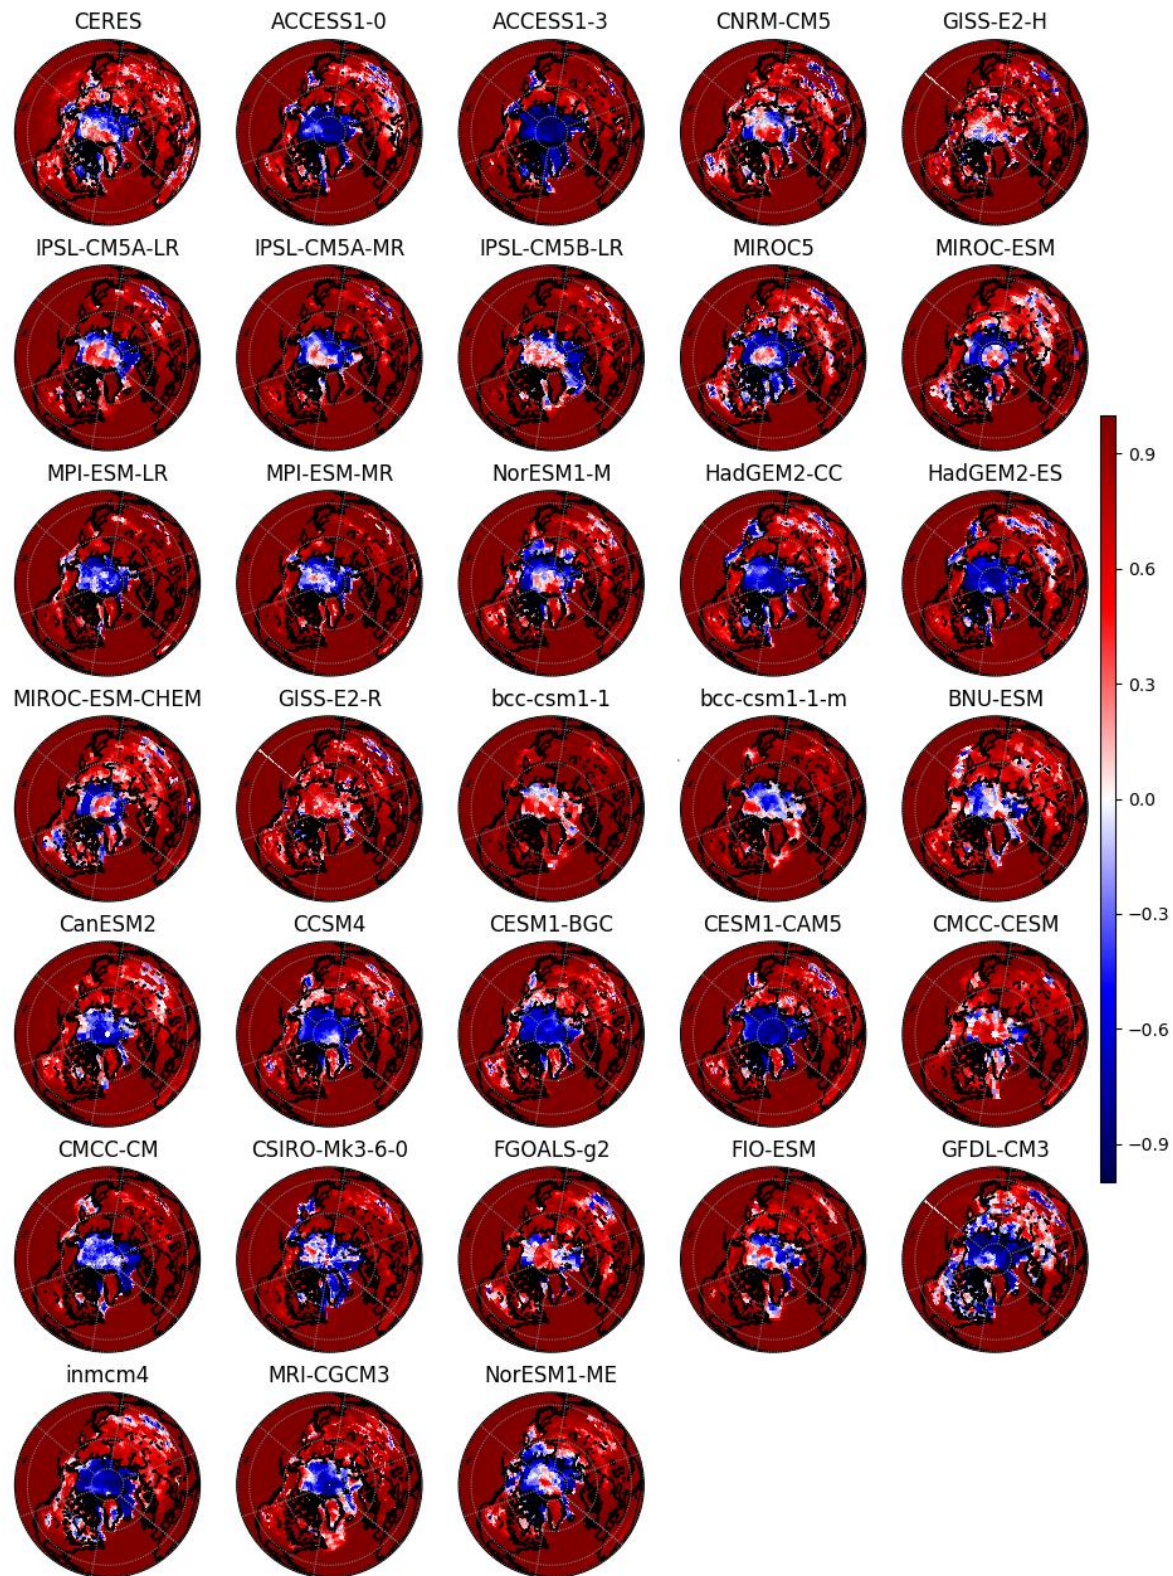

**Figure S3** Correlation between SWcre and net solar radiation at the surface SWsfc shown by 32 CMIP5 earth system models and Satellites CERES over 2001-2016 over northern hemisphere.



46  
47  
48

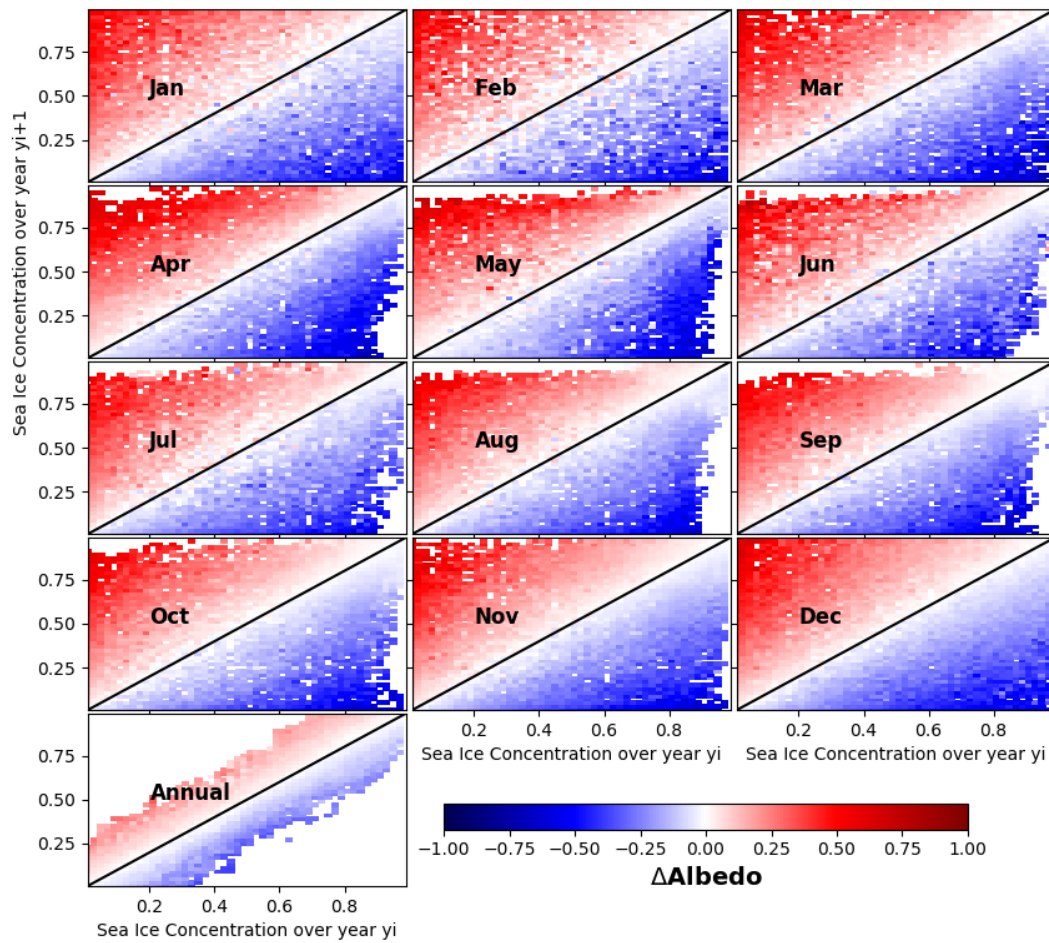

49  
50  
51  
52  
53  
54  
55  
56  
57

**Figure S4** Monthly and annual albedo change between two consecutive years  $y_{i+1}$  and  $y_i$  over Antarctic sea as function of sea ice concentration SIC of the year  $y_{i+1}$  and  $y_i$  from 2001-2016 time period.

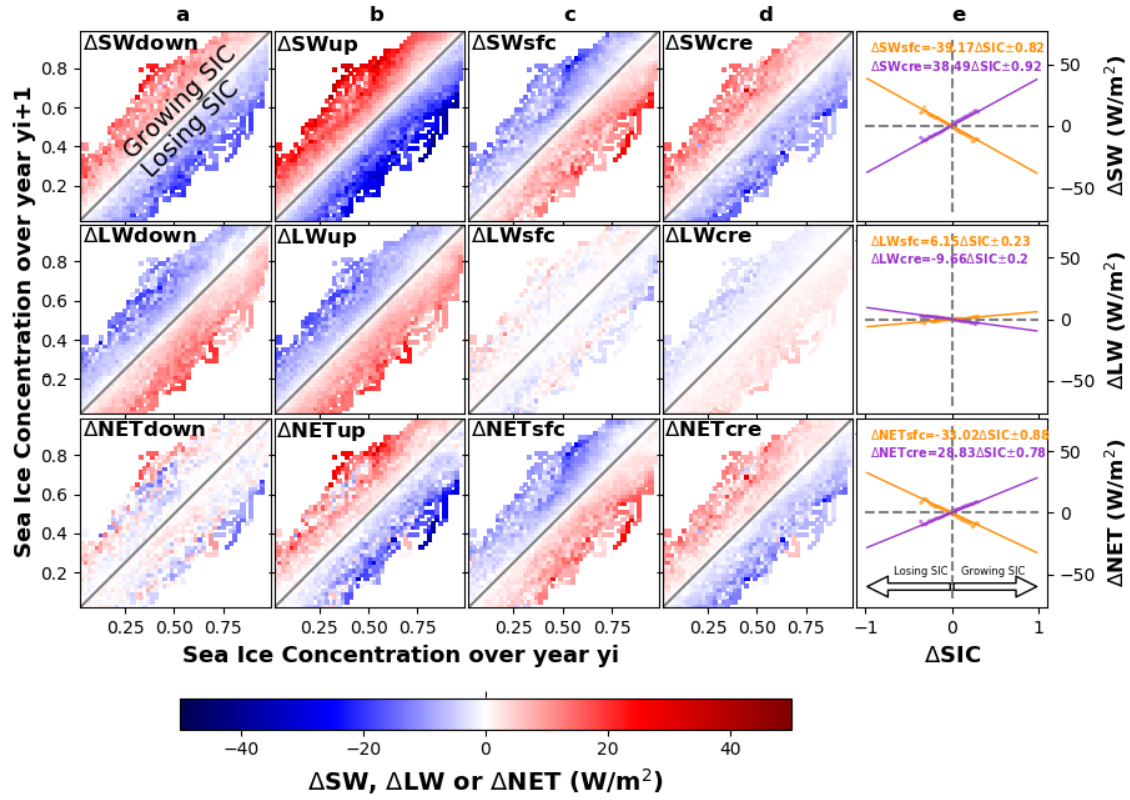

**Figure S5** Annual changes in SW, LW and NET as function of SIC. Annual changes in SW (top), LW (middle) and NET (bottom) of radiative down (a), up (b), sfc=down-up (c) and cre (d) over Arctic sea as function of SIC change between two consecutive years  $y_{i+1}$  and  $y_i$  from 2001-2016 time period. The top triangles in (c) top refers to the increase (growing) in SIC while the blue color means a reduction (cooling) in  $SW_{sfc}$ . Whereas, the top triangles in (d) refers to the increase in SIC while the red color means an increase (decreasing the cooling role of clouds) in  $SW_{cre}$ . Each dot in column (e) represent the average of one parallel to the diagonal in (c) or (d).

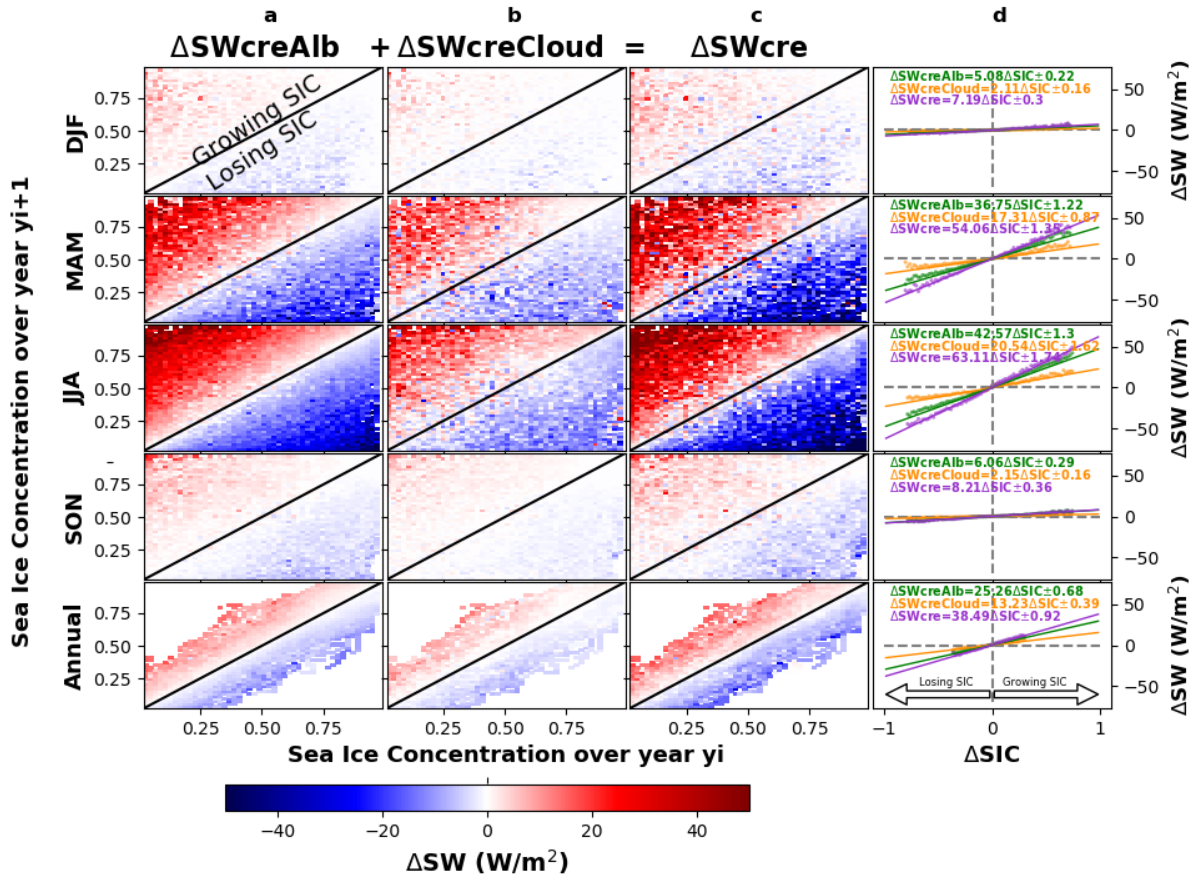

**Figure S6** Seasonal and annual changes in SWcreAlb, SWcreCloud and SWcre over Arctic sea as function of SIC change between two consecutive years  $y_{i+1}$  and  $y_i$  from 2001-2016 time period. All the analysis are based on observations from satellites data.
